# Supplementary material for: Adjusting health spending for the presence of comorbidities: an application to United States national inpatient data
Source: PubMed Central journal article supplement (PMC5574833; doi:10.1186/s13561-017-0166-2), 2017-08-29
Supplement: 13561_2017_166_MOESM1_ESM.pdf [file 13561_2017_166_MOESM1_ESM.pdf]

# METHODS ANNEX: Adjusting health spending for the presence of comorbidities: an application to United States national inpatient data

Short title: Adjusting health spending for comorbidities

## Contents

Introduction  
Extracting, mapping, and cleaning data  
Comorbidity selection  
Modeling risk of excess spending  
Calculating attributable fractions  
Generating flows and adjustments

## Introduction

A regression-based framework was used to model the share of spending for a health system encounter that is attributable to comorbidities. In this model, spending was transferred away from an encounter's primary diagnosis and systematically redistributed across comorbidities to more accurately reflect the true cost of treating each cause.

## Extracting, mapping, and cleaning data

The National Inpatient Sample survey (NIS) was used to demonstrate our method for comorbidity adjustment because it contains multiple secondary diagnoses in addition to a primary diagnosis. The unit of analysis is an encounter, which corresponds to a single inpatient hospital stay. The NIS dataset contains on average 5.3 secondary diagnoses per inpatient encounter (Table 1).

**Table 1: Average number of diagnoses (primary diagnosis and comorbidities) by year in the NIS data**

| Year | NIS |
|------|-----|
| 1996 | 3.6 |
| 1997 | 3.7 |
| 1998 | 3.8 |
| 1999 | 3.8 |
| 2000 | 3.9 |
| 2001 | 4.1 |
| 2002 | 4.4 |
| 2003 | 4.6 |
| 2004 | 4.8 |
| 2005 | 5.1 |
| 2006 | 5.4 |
| 2007 | 5.8 |
| 2008 | 6.3 |
| 2009 | 6.9 |
| 2010 | 7.4 |
| 2011 | 8.0 |
| 2012 | 8.2 |

Age, sex, primary diagnosis, secondary diagnoses (comorbidities), patient weights and health spending were extracted from the NIS data for each inpatient encounter. Diagnoses are recorded using International Classification of Disease version 9 (ICD9) classification (1), (2). All diagnoses were mapped from ICD9 code to Global Burden of Disease (GBD) 2013 cause classification. Our analysis was based on level III of the GBD cause hierarchy, which classifies causes of illness and health spending across 169 causes. These causes of illness are listed in Table 2, stratified by age group. Observations which failed to map were removed. This occurred in 17% of cases, and is due to reporting error.

**Table 2: Causes of illness included in analysis by age category**

| 0-14 years         | 15-44 years        | 45-64 years        | 65 years and older |
|--------------------|--------------------|--------------------|--------------------|
| Tuberculosis       | Tuberculosis       | Tuberculosis       | Tuberculosis       |
| HIV/AIDS           | HIV/AIDS           | HIV/AIDS           | HIV/AIDS           |
| Diarrheal diseases | Diarrheal diseases | Diarrheal diseases | Diarrheal diseases |

|                                               |                                               |                                             |                                             |
|-----------------------------------------------|-----------------------------------------------|---------------------------------------------|---------------------------------------------|
| Intestinal infectious diseases                | Intestinal infectious diseases                | Intestinal infectious diseases              | Intestinal infectious diseases              |
| Lower respiratory infections                  | Lower respiratory infections                  | Lower respiratory infections                | Lower respiratory infections                |
| Upper respiratory infections                  | Upper respiratory infections                  | Upper respiratory infections                | Upper respiratory infections                |
| Otitis media                                  | Otitis media                                  | Otitis media                                | Otitis media                                |
| Meningitis                                    | Meningitis                                    | Meningitis                                  | Meningitis                                  |
| Encephalitis                                  | Encephalitis                                  | Encephalitis                                | Encephalitis                                |
| Whooping cough                                | Varicella and herpes zoster                   | Varicella and herpes zoster                 | Varicella and herpes zoster                 |
| Varicella and herpes zoster                   | Malaria                                       | Malaria                                     | Other neglected tropical diseases           |
| Other neglected tropical diseases             | Cysticercosis                                 | Other neglected tropical diseases           | Protein-energy malnutrition                 |
| Maternal hypertensive disorders               | Other neglected tropical diseases             | Maternal hypertensive disorders             | Iron-deficiency anemia                      |
| Indirect maternal deaths                      | Maternal hemorrhage                           | Complications of abortion                   | Other nutritional deficiencies              |
| Other maternal disorders                      | Maternal sepsis and other maternal infections | Indirect maternal deaths                    | Sexually transmitted diseases excluding HIV |
| Preterm birth complications                   | Maternal hypertensive disorders               | Other maternal disorders                    | Hepatitis                                   |
| Neonatal encephalopathy                       | Obstructed labor                              | Protein-energy malnutrition                 | Other infectious diseases                   |
| Neonatal sepsis and other neonatal infections | Complications of abortion                     | Iron-deficiency anemia                      | Septicemia                                  |
| Hemolytic disease and other neonatal jaundice | Indirect maternal deaths                      | Other nutritional deficiencies              | Esophageal cancer                           |
| Other neonatal disorders                      | Other maternal disorders                      | Sexually transmitted diseases excluding HIV | Stomach cancer                              |
| Protein-energy malnutrition                   | Protein-energy malnutrition                   | Hepatitis                                   | Liver cancer                                |
| Iron-deficiency anemia                        | Iron-deficiency anemia                        | Other infectious diseases                   | Larynx cancer                               |
| Sexually transmitted diseases excluding HIV   | Other nutritional deficiencies                | Septicemia                                  | Lung, bronchus, and trachea cancer          |
| Hepatitis                                     | Sexually transmitted diseases excluding HIV   | Esophageal cancer                           | Breast cancer                               |
| Other infectious diseases                     | Hepatitis                                     | Stomach cancer                              | Cervical cancer                             |
| Septicemia                                    | Other infectious diseases                     | Liver cancer                                | Uterine cancer                              |
| Brain and nervous system cancer               | Septicemia                                    | Larynx cancer                               | Prostate cancer                             |
| Non-Hodgkin lymphoma                          | Esophageal cancer                             | Lung, bronchus, and trachea cancer          | Colon and rectum cancer                     |
| Leukemia                                      | Stomach cancer                                | Breast cancer                               | Mouth cancer                                |
| Other neoplasms                               | Liver cancer                                  | Cervical cancer                             | Nasopharynx cancer                          |
| Cerebrovascular disease                       | Larynx cancer                                 | Uterine cancer                              | Other pharynx cancer                        |

|                                                     |                                    |                                      |                                               |
|-----------------------------------------------------|------------------------------------|--------------------------------------|-----------------------------------------------|
| Cardiomyopathy and myocarditis                      | Lung, bronchus, and trachea cancer | Prostate cancer                      | Gallbladder and biliary tract cancer          |
| Other cardiovascular and circulatory diseases       | Breast cancer                      | Colon and rectum cancer              | Pancreatic cancer                             |
| Heart failure                                       | Cervical cancer                    | Mouth cancer                         | Malignant skin melanoma                       |
| Hypertension                                        | Uterine cancer                     | Nasopharynx cancer                   | Non-melanoma skin cancer                      |
| Chronic obstructive pulmonary disease               | Prostate cancer                    | Other pharynx cancer                 | Ovarian cancer                                |
| Asthma                                              | Colon and rectum cancer            | Gallbladder and biliary tract cancer | Bladder cancer                                |
| Interstitial lung disease and pulmonary sarcoidosis | Mouth cancer                       | Pancreatic cancer                    | Brain and nervous system cancer               |
| Other chronic respiratory diseases                  | Other pharynx cancer               | Malignant skin melanoma              | Thyroid cancer                                |
| Cirrhosis                                           | Pancreatic cancer                  | Non-melanoma skin cancer             | Mesothelioma                                  |
| Peptic ulcer disease                                | Malignant skin melanoma            | Ovarian cancer                       | Hodgkin cancer                                |
| Gastritis and duodenitis                            | Non-melanoma skin cancer           | Bladder cancer                       | Non-Hodgkin lymphoma                          |
| Appendicitis                                        | Ovarian cancer                     | Brain and nervous system cancer      | Multiple myeloma                              |
| Paralytic ileus and intestinal obstruction          | Testicular cancer                  | Thyroid cancer                       | Leukemia                                      |
| Inguinal, femoral, and abdominal hernia             | Bladder cancer                     | Mesothelioma                         | Other neoplasms                               |
| Inflammatory bowel disease                          | Brain and nervous system cancer    | Hodgkin cancer                       | Rheumatic heart disease                       |
| Gallbladder and biliary diseases                    | Thyroid cancer                     | Non-Hodgkin lymphoma                 | Ischemic heart disease                        |
| Pancreatitis                                        | Hodgkin cancer                     | Multiple myeloma                     | Cerebrovascular disease                       |
| Other digestive diseases                            | Non-Hodgkin lymphoma               | Leukemia                             | Hypertensive heart disease                    |
| Epilepsy                                            | Multiple myeloma                   | Other neoplasms                      | Cardiomyopathy and myocarditis                |
| Migraine                                            | Leukemia                           | Rheumatic heart disease              | Atrial fibrillation and flutter               |
| Other neurological disorders                        | Other neoplasms                    | Ischemic heart disease               | Aortic aneurysm                               |
| Schizophrenia                                       | Rheumatic heart disease            | Cerebrovascular disease              | Peripheral vascular disease                   |
| Alcohol use disorders                               | Ischemic heart disease             | Hypertensive heart disease           | Endocarditis                                  |
| Drug use disorders                                  | Cerebrovascular disease            | Cardiomyopathy and myocarditis       | Other cardiovascular and circulatory diseases |

|                                                   |                                                     |                                                     |                                                     |
|---------------------------------------------------|-----------------------------------------------------|-----------------------------------------------------|-----------------------------------------------------|
| Depressive disorders                              | Hypertensive heart disease                          | Atrial fibrillation and flutter                     | Heart failure                                       |
| Bipolar disorder                                  | Cardiomyopathy and myocarditis                      | Aortic aneurysm                                     | Hypertension                                        |
| Anxiety disorders                                 | Atrial fibrillation and flutter                     | Peripheral vascular disease                         | Hyperlipidemia                                      |
| Eating disorders                                  | Aortic aneurysm                                     | Endocarditis                                        | Chronic obstructive pulmonary disease               |
| Autistic spectrum disorders                       | Peripheral vascular disease                         | Other cardiovascular and circulatory diseases       | Pneumoconiosis                                      |
| Attention-deficit/hyperactivity disorder          | Endocarditis                                        | Heart failure                                       | Asthma                                              |
| Conduct disorder                                  | Other cardiovascular and circulatory diseases       | Hypertension                                        | Interstitial lung disease and pulmonary sarcoidosis |
| Other mental and substance use disorders          | Heart failure                                       | Hyperlipidemia                                      | Other chronic respiratory diseases                  |
| Diabetes mellitus                                 | Hypertension                                        | Chronic obstructive pulmonary disease               | Cirrhosis                                           |
| Acute glomerulonephritis                          | Hyperlipidemia                                      | Asthma                                              | Peptic ulcer disease                                |
| Chronic kidney disease                            | Chronic obstructive pulmonary disease               | Interstitial lung disease and pulmonary sarcoidosis | Gastritis and duodenitis                            |
| Urinary diseases and male infertility             | Asthma                                              | Other chronic respiratory diseases                  | Appendicitis                                        |
| Gynecological diseases                            | Interstitial lung disease and pulmonary sarcoidosis | Cirrhosis                                           | Paralytic ileus and intestinal obstruction          |
| Hemoglobinopathies and hemolytic anemias          | Other chronic respiratory diseases                  | Peptic ulcer disease                                | Inguinal, femoral, and abdominal hernia             |
| Endocrine, metabolic, blood, and immune disorders | Cirrhosis                                           | Gastritis and duodenitis                            | Inflammatory bowel disease                          |
| Acute renal failure                               | Peptic ulcer disease                                | Appendicitis                                        | Vascular intestinal disorders                       |
| Rheumatoid arthritis                              | Gastritis and duodenitis                            | Paralytic ileus and intestinal obstruction          | Gallbladder and biliary diseases                    |
| Low back and neck pain                            | Appendicitis                                        | Inguinal, femoral, and abdominal hernia             | Pancreatitis                                        |
| Other musculoskeletal disorders                   | Paralytic ileus and intestinal obstruction          | Inflammatory bowel disease                          | Other digestive diseases                            |
| Congenital anomalies                              | Inguinal, femoral, and abdominal hernia             | Vascular intestinal disorders                       | Alzheimer disease and other dementias               |
| Skin and subcutaneous diseases                    | Inflammatory bowel disease                          | Gallbladder and biliary diseases                    | Parkinson disease                                   |

|                                            |                                          |                                                   |                                                   |
|--------------------------------------------|------------------------------------------|---------------------------------------------------|---------------------------------------------------|
| Sense organ disorders                      | Vascular intestinal disorders            | Pancreatitis                                      | Epilepsy                                          |
| Oral disorders                             | Gallbladder and biliary diseases         | Other digestive diseases                          | Multiple sclerosis                                |
| Road injuries                              | Pancreatitis                             | Alzheimer disease and other dementias             | Migraine                                          |
| Other transport injuries                   | Other digestive diseases                 | Parkinson disease                                 | Tension-type headache                             |
| Falls                                      | Epilepsy                                 | Epilepsy                                          | Other neurological disorders                      |
| Drowning                                   | Multiple sclerosis                       | Multiple sclerosis                                | Schizophrenia                                     |
| Fire, heat, and hot substances             | Migraine                                 | Migraine                                          | Alcohol use disorders                             |
| Poisonings                                 | Tension-type headache                    | Tension-type headache                             | Drug use disorders                                |
| Exposure to mechanical forces              | Other neurological disorders             | Other neurological disorders                      | Depressive disorders                              |
| Animal contact                             | Schizophrenia                            | Schizophrenia                                     | Bipolar disorder                                  |
| Foreign body                               | Alcohol use disorders                    | Alcohol use disorders                             | Anxiety disorders                                 |
| Other unintentional injuries               | Drug use disorders                       | Drug use disorders                                | Other mental and substance use disorders          |
| Self-harm                                  | Depressive disorders                     | Depressive disorders                              | Diabetes mellitus                                 |
| Interpersonal violence                     | Bipolar disorder                         | Bipolar disorder                                  | Acute glomerulonephritis                          |
| Exposure to forces of nature               | Anxiety disorders                        | Anxiety disorders                                 | Chronic kidney disease                            |
| Collective violence and legal intervention | Eating disorders                         | Other mental and substance use disorders          | Urinary diseases and male infertility             |
|                                            | Autism spectrum disorders                | Diabetes mellitus                                 | Gynecological diseases                            |
|                                            | Attention-deficit/hyperactivity disorder | Acute glomerulonephritis                          | Hemoglobinopathies and hemolytic anemias          |
|                                            | Conduct disorder                         | Chronic kidney disease                            | Endocrine, metabolic, blood, and immune disorders |
|                                            | Idiopathic intellectual disability       | Urinary diseases and male infertility             | Acute renal failure                               |
|                                            | Other mental and substance use disorders | Gynecological diseases                            | Rheumatoid arthritis                              |
|                                            | Diabetes mellitus                        | Hemoglobinopathies and hemolytic anemias          | Osteoarthritis                                    |
|                                            | Acute glomerulonephritis                 | Endocrine, metabolic, blood, and immune disorders | Low back and neck pain                            |
|                                            | Chronic kidney disease                   | Acute renal failure                               | Gout                                              |
|                                            | Urinary diseases and male infertility    | Rheumatoid arthritis                              | Other musculoskeletal disorders                   |
|                                            | Gynecological diseases                   | Osteoarthritis                                    | Congenital anomalies                              |

|  |                                                   |                                            |                                            |
|--|---------------------------------------------------|--------------------------------------------|--------------------------------------------|
|  | Hemoglobinopathies and hemolytic anemias          | Low back and neck pain                     | Skin and subcutaneous diseases             |
|  | Endocrine, metabolic, blood, and immune disorders | Gout                                       | Sense organ diseases                       |
|  | Acute renal failure                               | Other musculoskeletal disorders            | Oral disorders                             |
|  | Rheumatoid arthritis                              | Congenital anomalies                       | Road injuries                              |
|  | Osteoarthritis                                    | Skin and subcutaneous diseases             | Other transport injuries                   |
|  | Low back and neck pain                            | Sense organ diseases                       | Falls                                      |
|  | Gout                                              | Oral disorders                             | Drowning                                   |
|  | Other musculoskeletal disorders                   | Road injuries                              | Fire, heat, and hot substances             |
|  | Congenital anomalies                              | Other transport injuries                   | Poisonings                                 |
|  | Skin and subcutaneous diseases                    | Falls                                      | Exposure to mechanical forces              |
|  | Sense organ diseases                              | Drowning                                   | Animal contact                             |
|  | Oral disorders                                    | Fire, heat, and hot substances             | Foreign body                               |
|  | Road injuries                                     | Poisonings                                 | Other unintentional injuries               |
|  | Other transport injuries                          | Exposure to mechanical forces              | Self-harm                                  |
|  | Falls                                             | Animal contact                             | Interpersonal violence                     |
|  | Drowning                                          | Foreign body                               | Exposure to forces of nature               |
|  | Fire, heat, and hot substances                    | Other unintentional injuries               | Collective violence and legal intervention |
|  | Poisonings                                        | Self-harm                                  |                                            |
|  | Exposure to mechanical forces                     | Interpersonal violence                     |                                            |
|  | Animal contact                                    | Exposure to forces of nature               |                                            |
|  | Foreign body                                      | Collective violence and legal intervention |                                            |
|  | Other unintentional injuries                      |                                            |                                            |
|  | Self-harm                                         |                                            |                                            |
|  | Interpersonal violence                            |                                            |                                            |
|  | Exposure to forces of nature                      |                                            |                                            |
|  | Collective violence and legal intervention        |                                            |                                            |

ICD9 uses two coding systems to classify injuries: N-codes and E-codes. E-codes, which state the external cause of injury or poisoning, are most similar to the way GBD classifies injuries. However, in the NIS, E-codes are not listed as primary diagnoses. To accurately capture health system encounters resulting from injuries classified using E-codes, the E-code listed first was considered the primary diagnosis. The one exception to this rule was E-codes corresponding to adverse medical treatment. These E-codes were not allowed to be primary diagnoses because they are injuries generally occurring due to treatment complications, and are thus not typically the underlying reason for the health systems encounter. If multiple E-codes were listed for an observation, the first E-code that was not adverse medical treatment was selected as the primary diagnosis.

ICD9 codes corresponding to non-disease well person care were not allowed to be primary diagnoses for inpatient services. Similarly, encounters that violated GBD age or sex restrictions (shown in Table 2), such as females with prostate cancer or adults with neonatal illnesses, were also excluded. Finally, ICD9 codes with a primary diagnosis that was mapped to intermediate causes of illness rather than underlying causes were also removed. When a primary diagnosis was mapped to a viable cause, but secondary diagnoses were not, these secondary diagnoses were removed.

After mapping from ICD9 codes to GBD causes, the data still contained N-codes for injuries. A probabilistic replacement was used to replace these remaining N-codes with E-codes (and then mapped to GBD cause). Probability maps for this probabilistic assignment were created by pooling data across all years to make age-specific E-code probabilities, conditional on having each N-code. The conditional probabilities used in this assignment were calculated using full four- or five-digit codes from NIS.

#### **EXAMPLE. N-code proportions and replacement**

Among 55-year-olds, the GBD injury causes and the corresponding probability weights associated with the N-code N11 (Dislocation of hip) are:

- Animal contact (0.008)
- Exposure to mechanical forces (0.017)
- Other transport injuries (0.011)
- Other unintentional injuries (0.16)
- Road injuries (0.370)
- Falls (0.440)

Thus, whenever N11 appeared in the diagnosis list for 55-year-olds, it was remapped as falls in 44% of observations, as road injuries in 37% of observations, etc.

An additional challenge of mapping ICD9 codes to GBD causes occurred when abbreviated ICD9 codes (not full, 5-digit ICD9 codes) led to a diagnosis mapping to a level I or II GBD cause, rather than level III. We referred to these cases as “not elsewhere classified” (NEC). For the few NEC that existed in the NIS, a probabilistic replacement was used to replace NEC causes with viable GBD level III causes. The data were combined across all years to make age-specific probability maps. These maps were stratified by age because disease burden and the distribution of causes are a function of age. These maps were used to probabilistically reassign NEC causes to non-NEC causes.



#### EXAMPLE. NEC proportions and replacement

Among 55-year-olds, the causes in the cardiovascular disease (CVD) family and their corresponding probabilities of occurrence are:

- Endocarditis (0.003)
- Rheumatic heart disease (0.006)
- Cardiomyopathy and myocarditis (0.007)
- Aortic aneurysm (0.008)
- Hypertensive heart disease (0.012)
- Peripheral vascular disease (0.030)
- Atrial fibrillation and flutter (0.070)
- Other cardiovascular and circulatory diseases (0.112)
- Heart failure (0.144)
- Cerebrovascular disease (0.151)
- Ischemic heart disease (0.457)

Thus, whenever a CVD NEC cause appeared in the diagnosis list for 55-year-olds, it was remapped as ischemic heart disease in 45.7% of observations, cerebrovascular disease in 15.1% of observations, etc.

If a single observation had multiple diagnoses with the same GBD cause (for example, two or more secondary diagnoses of septicemia), the duplicate comorbidities were removed.

Encounters were divided into four age categories. The four age categories were: (1) 0-14 years, (2) 15-44 years, (3) 45-64 years, and (4) 65 years and above. These age groups are intended to roughly identify major life stages and are valuable because age groups beyond 5-year groupings have distinct patterns of comorbidity and health care utilization. While the groups are not precisely associative, other research has utilized the same age groupings. These groups have been relied on previously for reporting spending stratified by distinct life stages.<sup>4</sup>

We split our data by primary diagnosis and age group, pooling across sex and time. Despite pooling across these dimensions, there were several rare causes of illness, such as malaria and leprosy, with few observations. Rather than trying to estimate the effect of comorbidities on spending for these causes of illness, causes with fewer than 1,000 reported encounters across all years and both sexes within an age category were excluded from analysis.

In order to generate uncertainty intervals, 1,000 bootstrap samples were generated. All subsequent steps in comorbidity analysis were carried out 1,000 times, once for each sample. All reported results are the mean estimates across the bootstrap samples, and uncertainty is reported as the 2.5 and 97.5 percentile across the bootstrap draws.

#### Comorbidity selection

To be comprehensive, nearly all conditions present in the data were included in analysis. In a few cases, the comorbidities that were allowed for a primary diagnosis were restricted due to research aims and data availability.

Infrequently occurring comorbidities seemed less likely to be systematically related to price and greatly increased the computation needed for this analysis. To address this, comorbidities were excluded for a given primary diagnosis if their probability of occurring was less than 0.1. This threshold ensured that

only the most relevant and common comorbidities were included in the analysis for each primary diagnosis.

**Figure 1: Distribution of comorbidities for 155 primary causes. Shown for the 65+ age group in NIS.**

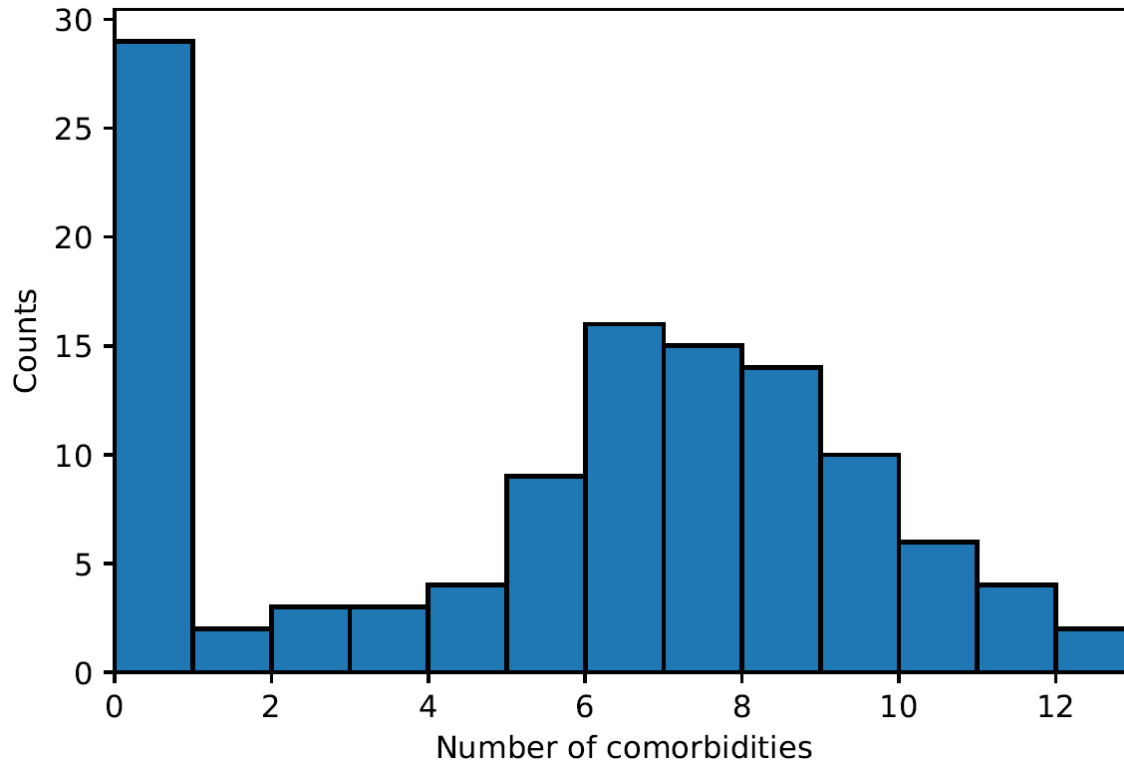

Figure 1 shows the distribution of comorbidities included for each primary diagnosis. 75% of primary diagnoses have at least one comorbidity. 68% of all primary diagnoses have at least four comorbidities.

**Figure 2: Mean number of comorbidities per primary cause across threshold values. Shown for the 65+ age group.**

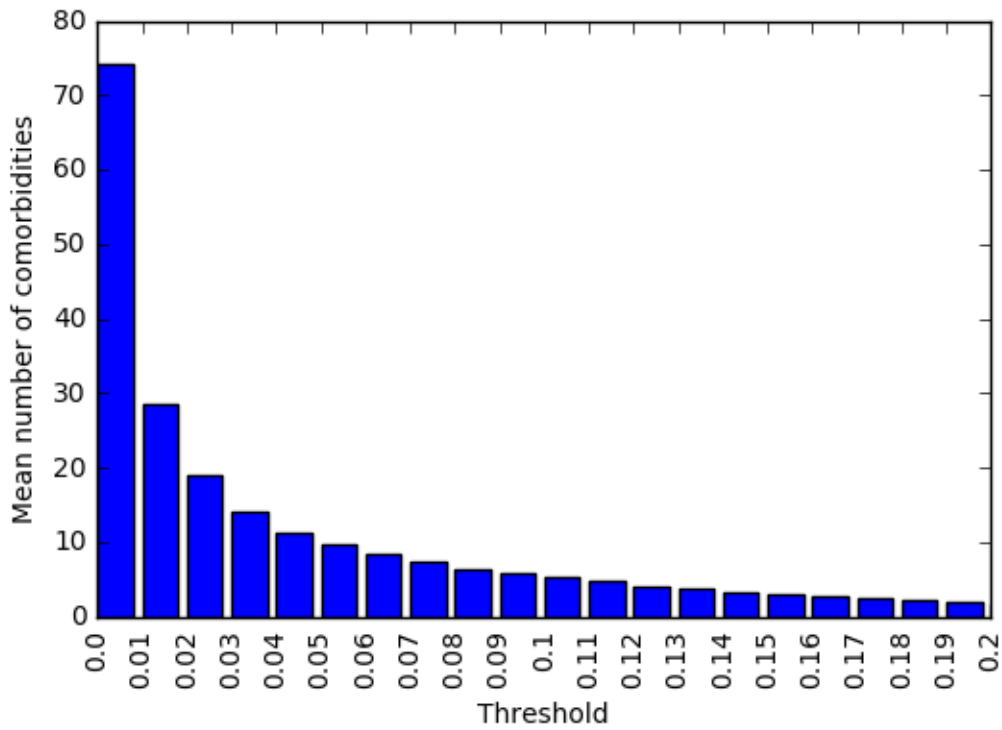

Figure 2 shows the mean number of comorbidities for different threshold values in the 65+ age group of NIS. This figure illustrates that there are a high number of low frequency comorbidities and a fairly consistent number of comorbidities once the low-frequency comorbid causes are removed.

**Figure 3: Histogram of mean number of comorbidities not included per patient at a given threshold. Shown for the 65+ age group.**

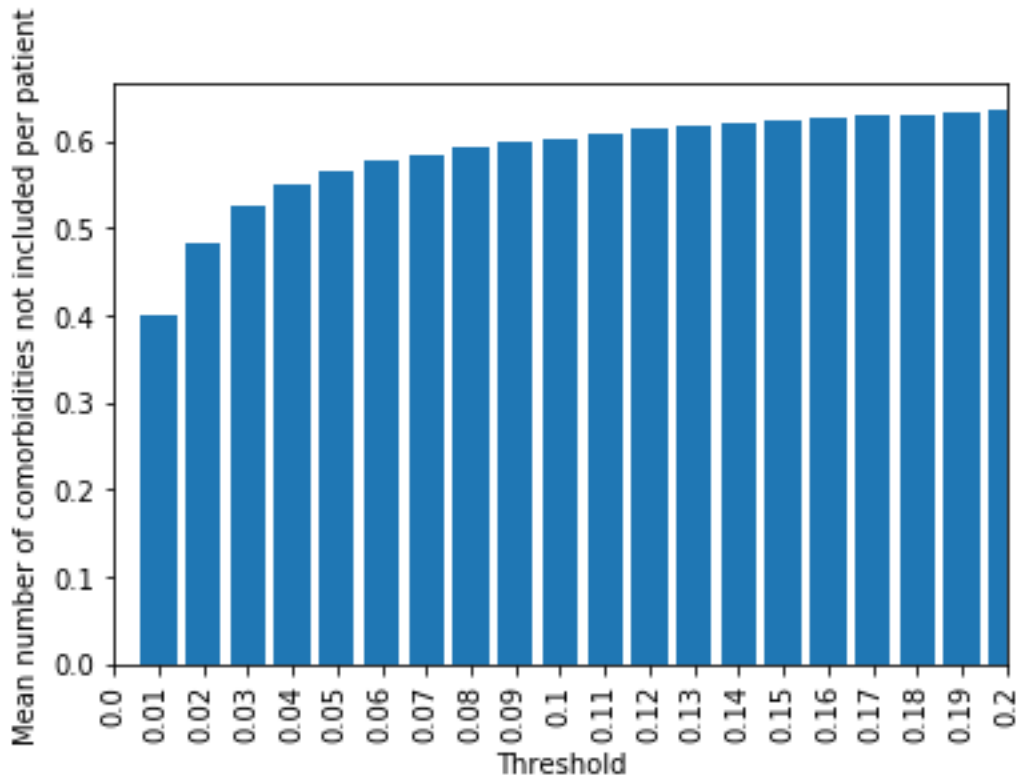

Figure 3 shows the mean number of comorbidities per person that were omitted from the analysis as a result of the frequency threshold that was applied. Using a threshold of 0.1, the average number of comorbidities excluded per patient was 0.6. The average number of comorbidities excluded per patient did not vary dramatically at different frequency thresholds.

**EXAMPLE. Comorbidity pairs selection**

Among 45-64 year olds, ischemic heart disease (IHD) occurs as both a primary and secondary diagnosis.

As a primary diagnosis, IHD had 145 associated secondary diagnoses. Of the 145 associated secondary diagnoses, nine had probabilities of co-occurrence greater than or equal to 0.1. Therefore, only the following secondary diagnoses were considered as comorbidities for IHD:

| Comorbidity                                   | Probability |
|-----------------------------------------------|-------------|
| Hypertension                                  | 0.549       |
| Hyperlipidemia                                | 0.514       |
| Tobacco                                       | 0.325       |
| Diabetes mellitus                             | 0.316       |
| Other cardiovascular and circulatory diseases | 0.180       |
| Heart failure                                 | 0.161       |
| Other digestive disorders                     | 0.127       |

|                                                                                                                                                                                                                                                                                                                |                    |
|----------------------------------------------------------------------------------------------------------------------------------------------------------------------------------------------------------------------------------------------------------------------------------------------------------------|--------------------|
| Obesity                                                                                                                                                                                                                                                                                                        | 0.121              |
| Chronic obstructive pulmonary disease                                                                                                                                                                                                                                                                          | 0.116              |
| IHD occurred as a secondary diagnosis for 132 primary diagnoses. Of the 132 primary diagnoses, IHD occurred with a probability greater than or equal to 10% in 77. Therefore, IHD was considered as a comorbidity for 77 primary diagnoses. The top 10 primary diagnoses for which IHD was a comorbidity were: |                    |
| <b>Primary diagnosis</b>                                                                                                                                                                                                                                                                                       | <b>Probability</b> |
| Heart failure                                                                                                                                                                                                                                                                                                  | 0.520              |
| Peripheral vascular disease                                                                                                                                                                                                                                                                                    | 0.447              |
| Hypertensive heart disease                                                                                                                                                                                                                                                                                     | 0.404              |
| Rheumatic heart disease                                                                                                                                                                                                                                                                                        | 0.402              |
| Aortic aneurysm                                                                                                                                                                                                                                                                                                | 0.388              |
| Cardiomyopathy and myocarditis                                                                                                                                                                                                                                                                                 | 0.383              |
| Atrial fibrillation and flutter                                                                                                                                                                                                                                                                                | 0.345              |
| Other cardiovascular and circulatory diseases                                                                                                                                                                                                                                                                  | 0.313              |
| Chronic kidney disease                                                                                                                                                                                                                                                                                         | 0.284              |
| Cerebrovascular disease                                                                                                                                                                                                                                                                                        | 0.268              |

We further refine the primary cause-comorbidity pairing to ensure that resources are reallocated from a primary cause only to causes that are true comorbidities, rather than manifestations of the same conditions. To do this, we apply three exclusion criteria:

1. Exclude intermediate causes. For example, remove skin and subcutaneous diseases as comorbidities when the primary diagnosis is for diabetes, and remove heart failure as a comorbidity when CVD is the primary diagnosis.
2. Exclude residual “other” categories, such as other indirect maternal causes and other infectious diseases.
3. Exclude risk factors, impairments, and well care causes, such as hyperlipidemia, renal failure, and well pregnancies.

These restrictions were set in consultation with medical professionals who have experience using ICD9 coding in clinical settings. The full list of restrictions is outlined in Table 3. Funds were not permitted to flow from the primary diagnoses in the left column to the comorbidities in the right column.

**Table 3: Comorbidity restrictions**

| Primary diagnosis | Comorbidity                                         |
|-------------------|-----------------------------------------------------|
| All causes        | Indirect (other) maternal causes                    |
|                   | Protein-energy malnutrition                         |
|                   | Iron-deficiency anemia and blood related procedures |
|                   | Other infectious diseases                           |
|                   | Septicemia                                          |
|                   | Hypertension                                        |
|                   | Hyperlipidemia                                      |
|                   | Urinary diseases and male infertility               |
|                   | Endocrine, metabolic, blood, and immune disorders   |

|                                                                 |                                                                                                             |
|-----------------------------------------------------------------|-------------------------------------------------------------------------------------------------------------|
|                                                                 | Acute renal failure<br>Adverse effects of medical treatment<br>Heart Failure<br>All “other” residual causes |
| All causes <i>except</i> lower and upper respiratory infections | Otitis media                                                                                                |
| Preterm birth complications<br>All cancers                      | All comorbidities                                                                                           |
| All cardiovascular diseases                                     | Atrial fibrillation and flutter                                                                             |
| Diabetes                                                        | Skin and subcutaneous diseases<br>Skin and subcutaneous diseases<br>Sense organ diseases<br>All injuries    |

Modeling risk of excess spending

A log-linear regression model was used to estimate the risk of excess spending due to comorbidities. Log-linear regression is one of the most commonly used methods for modeling health care spending data (3). A model was fit separately for each primary condition and age category. Spending for a health system encounter was the dependent variable and binary indicators identifying an encounter was coded with the relevant comorbidities were the independent variables. The simplest form of the model is illustrated by Equation (1):

$$\log(\text{expenditure}_i) = \beta_{i0} + \sum_{j=1}^J \beta_{ij} \text{comorbidity}_{ij} + \varepsilon_i \tag{1}$$

Using this equation, excess spending was estimated independently for each primary diagnosis *i*, using age category-specific encounter-level data. The set of *J* comorbidities was included. Binary indicators for year and sex were included to control for heterogeneous spending across the time and sex. The relative risk of excess spending for *i* induced by comorbidity *j* is the coefficient on the primary diagnosis-comorbidity pair ( $\beta_{ij}$ ). Only statistically significant pairs ( $p < 0.05$ ) were included in the final comorbidity adjustment.

The presence of a comorbidity generally increases health spending for a given primary diagnosis. In these cases,  $\beta_{ij} > 0$ , and the comorbid condition raised the cost of managing the primary condition, on average. Conversely, when  $\beta_{ij} < 0$ , costs of managing the primary condition decreased because of a comorbid condition. While empirically rare, this occurs if a comorbid condition makes standard treatment for the primary condition ineffective, unsafe, or poorly tolerated, necessitating less complex, and therefore less expensive, treatment.

**EXAMPLE. Understanding regression results**  
Among 45-64 year olds, IHD appeared as comorbidity when diabetes mellitus was the primary diagnosis. In addition, diabetes was a comorbidity for IHD as a primary diagnosis. After regression, the IHD-diabetes pair had a coefficient of 0.050. The presence of diabetes as a comorbidity made IHD more expensive to treat. The diabetes-IHD pair had a coefficient of 0.006. The presence of IHD as a comorbidity made diabetes more expensive to treat, but the effect of IHD on diabetes was less than the effect of diabetes on IHD.

### Calculating attributable fractions

The relative risk of excess spending due to comorbidities was then used to calculate the attributable fraction for each primary diagnosis-comorbidity pair. An attributable fraction is the proportion of disease spending on a primary diagnosis that is attributable to a specific comorbidity. The share of total spending for primary condition  $i$  attributable to comorbidity  $j$  is the product of the pair-specific relative risk of excess spending and the conditional probability of  $i$  and  $j$  co-occurring. This is illustrated by Equation (2):

$$AF_{ij} = p_{ij}(e^{\beta_{ij}} - 1) \quad (2)$$

#### EXAMPLE. Calculating attributable fractions

As seen in previous examples, the IHD-diabetes pair for 45-64 year olds has a probability of occurrence of 0.318 and a regression coefficient of 0.050. The attributable fraction for this pair is as follows:

$$AF_{IHD-diabetes} = 0.318(e^{0.050} - 1)$$

or

$$AF_{IHD-diabetes} = 0.016$$

This means that 1.6% of spending on the treatment and prevention of IHD is attributable to diabetes.

### Generating flows and adjustment scalars

The attributable fractions for all primary diagnosis-comorbidity pairs were then used to reallocate spending from primary diagnoses to comorbidities. We applied our estimates of attributable fractions to more granular, sex-specific categories disaggregated using 5-year age groups instead of the four highly aggregated age groups.

The outflows, resources transferred away from primary diagnosis  $i$  to comorbidity  $j$ , were calculated as the product of the attributable fraction  $AF_{ij}$  and the total spending on diagnosis  $i$ . The total outflow of resources from primary condition  $i$  due to all comorbidities is the sum of the outflows from  $i$  to all comorbidities under consideration, illustrated in Equation (4):

$$outflow_i = total\ expenditure_i * \sum_j AF_{ij} \quad (4)$$

A primary diagnosis in one health system encounter is often a comorbidity for another primary diagnosis in a different health system encounter. Thus, it was important to calculate not only the share of primary diagnosis  $i$  attributable to comorbidity  $j$ , but also to calculate the share of primary diagnosis  $j$  attributable to comorbidity  $i$ . These funds are inflows, or the resources transferred to  $i$  when it is listed as a comorbidity for each of the  $j$  other causes. The total inflow of resources from all comorbidities to primary diagnosis  $i$  was calculated as sum of the product of the total spending for  $j$  and the attributable fractions. Equation (5) illustrates the calculation of inflows:

$$inflow_i = \sum_j (total\ expenditure_j * AF_{ij}) \quad (5)$$

Because the comorbidity adjustment was a redistribution of resources, the total outflows across all causes in an age category should have been equal to the total inflows in that age category. That is, money flowing out of the primary diagnoses should have been the same as the money flowing to the

comorbidities. This assumption was used to verify the calculation of outflows and inflows by age category.

The netflow of resources for a primary condition captures the transfer of resources to and from that cause. That is, the netflow for cause  $i$  is the difference between the total inflows and total outflows for  $i$ , as illustrated in Equation (6). The netflow can be positive or negative. A positive netflow indicates that inflow for a cause is greater than outflow. Causes with positive netflows generally appeared often as comorbidities, and spending typically increased as a result of comorbidity adjustment. A negative netflow indicates outflow for a cause is greater than inflow. Causes with negative netflows generally appeared often as primary diagnoses and rarely as comorbidities. Spending on these causes typically decreased after comorbidity adjustment.

$$netflow_i = inflow_i - outflow_i \quad (6)$$

The final, comorbidity adjusted spending for cause  $i$  was the sum of the pre-comorbidity adjusted spending for  $i$  and its corresponding netflow, as shown in Equation (7):

$$adjusted\ expenditure_i = total\ expenditure_i + netflow_i \quad (7)$$

Relative increases and decreases in spending were described using comorbidity adjustment scalars. The scalar for cause  $i$  is defined as the netflow for  $i$  as a percent of the total spending on  $i$ . This is shown in Equation (8):

$$scalar_i = \frac{netflow_i}{total\ expenditure_i} + 1 \quad (8)$$

The value of the scalar represented the percent change in spending for that cause. For a given cause, a scalar greater than one represented an increase in spending, while a scalar less than one represented a decrease in spending. The scalars provided a common metric for comparing comorbidity adjustments between causes and across age categories.



### EXAMPLE. Calculating outflows, inflows, netflows and adjusted spending

The attributable fractions for 45-64 year olds with a primary diagnosis of IHD are:

| Comorbidity                           | Attributable fraction |
|---------------------------------------|-----------------------|
| Diabetes mellitus                     | 0.016                 |
| Chronic obstructive pulmonary disease | 0.011                 |

Total pre-comorbidity adjustment spending for all year included in this study for 45-64 year olds was \$672 billion. The pair-specific outflows for each comorbidity were:

| Comorbidity                           |                         | Outflow        |
|---------------------------------------|-------------------------|----------------|
| Diabetes mellitus                     | \$672 billion * 0.016 = | \$10.8 billion |
| Chronic obstructive pulmonary disease | \$672 billion * 0.011 = | \$7.4 billion  |

Thus, the total **outflow** from IHD to other causes was the sum of these three outflows, or approximately \$18.1 billion.

The **inflow** for IHD was the sum of the outflows from the 72 diseases for which IHD was a comorbidity to IHD. The inflow to IHD was \$31.6 billion.

Thus, the netflow for IHD was \$31.6 billion - \$18.1 billion, or \$13.5 billion. The final spending for IHD among 45-64 year olds was \$685.5 billion (\$672 billion pre-comorbidity spending + \$13.5 billion netflow), after adjusting for all comorbidities. There was a slight increase in spending on IHD in this age group after comorbidity adjustment of about 2%:

$$scalar_{IHD} = \frac{13.5}{672} + 1 = 1.02$$

Because IHD occurred frequently as a comorbidity, it had a net increase in spending due to comorbidity adjustment.

### References

1. GBD 2013 Mortality and Causes of Death Collaborators. Global, regional, and national age-sex specific all-cause and cause-specific mortality for 240 causes of death, 1990-2013: a systematic analysis for the Global Burden of Disease Study 2013. *The Lancet*. 2014 Dec;385(9663):117–71.
2. GBD 2013 DALYs and HALE Collaborators. Global, regional, and national disability-adjusted life years (DALYs) for 306 diseases and injuries and healthy life expectancy (HALE) for 188 countries, 1990-2013: quantifying the epidemiological transition. *The Lancet*. 2015 Nov 28;386(10009):2145–91.
3. Willard G Manning, John Mullahy. Estimating log models: to transform or not to transform? *J Health Econ*. 2001;20:461–94.
4. Dieleman JL, Baral R, Birger M, Bui AL, Bulchis A, Chapin A, Hamavid H, Horst C, Johnson EK, Joseph J, Lavado R, Lomsadze L, Reynolds A, Squires E, Campbell M, DeCenso B, Dicker D, Flaxman AD, Gabert R, Highfill T, Naghavi M, Nightingale N, Templin T, Tobias MI, Vos T, Murray CJL. US Spending on Personal Health Care and Public Health, 1996-2013. *JAMA*. 2016 July 5;316(24):2627-2646.
